# Supplementary material for: Mud Volcano Dynamics in Azerbaijan: The Overlooked Role of Creeping Mud Flows in Landscape Evolution
Source: Copernicus journal article supplement (doi:10.5194/egusphere-2025-6289), 2026-01-09
Supplement: Supplementary file 1 [file Fenske_et_al_Creeping_Mud_flows_supp.pdf › Fenske_et_al_Creeping_Mud_flows_supp.pdf]

# Mud Volcano Dynamics in Azerbaijan: The Overlooked Role of Creeping Mud Flows in Landscape Evolution

Caroline Fenske<sup>1\*</sup>, Petr Brož<sup>1</sup>, Adriano Mazzini<sup>2,3,4</sup>

<sup>1</sup>Institute of Geophysics of the Czech Academy of Sciences, Boční II/1401, Prague, Czech Republic

<sup>2</sup>Institute for Energy Technology (IFE), Kjeller, Norway

<sup>3</sup>Department of Geosciences, University of Oslo, Oslo, Norway

<sup>4</sup>Istituto Nazionale di Geofisica e Vulcanologia, Sezione Roma 2, Rome, Italy

*Correspondence to:* Caroline Fenske (fenske@ig.cas.cz)

S1 to 19: Gifts for volcanoes 1 to 19 in Table 1.

Table S1: GPS points of sticks planted on the Otman Bozdaq (AZ-25-OB) and Durandag (AZ-25-STI) mud volcanoes

| Campaign code | Sticks | Latitude [dec.°] | Longitude [dec.°] |
|---------------|--------|------------------|-------------------|
| AZ-25-OB-     | W      | 40.237889        | 49.510556         |
| AZ-25-OB-     | E      | 40.237972        | 49.511222         |
| AZ-25-STI-    | 1      | 40.160222        | 49.146917         |
| AZ-25-STI-    | 2      | 40.162472        | 49.148000         |
| AZ-25-STI-    | 3      | 40.164917        | 49.150667         |
| AZ-25-STI-    | 4      | 40.163889        | 49.153639         |
| AZ-25-STI-    | 5      | 40.156000        | 49.169222         |
| AZ-25-STI-    | 6      | 40.149694        | 49.175000         |

S20: Photos of sticks AZ-25-OB- W1 to W6 and E3 to E6 on Otman Bozdaq.

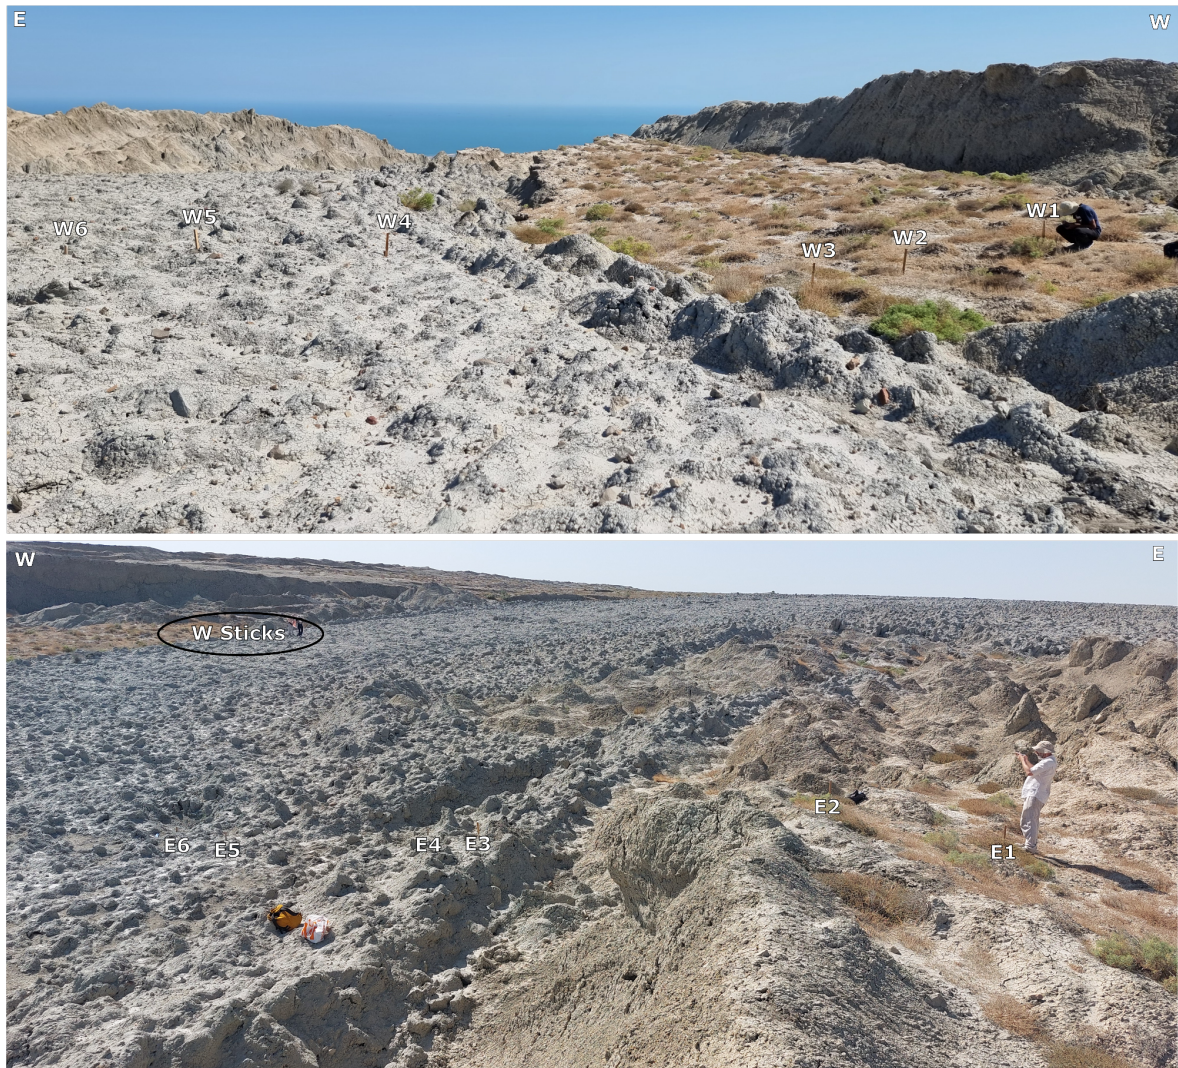



S21: Photos of aligned sticks AZ-25-OB- W1 to W6 and E2 to E6 on Otman Bozdağ.

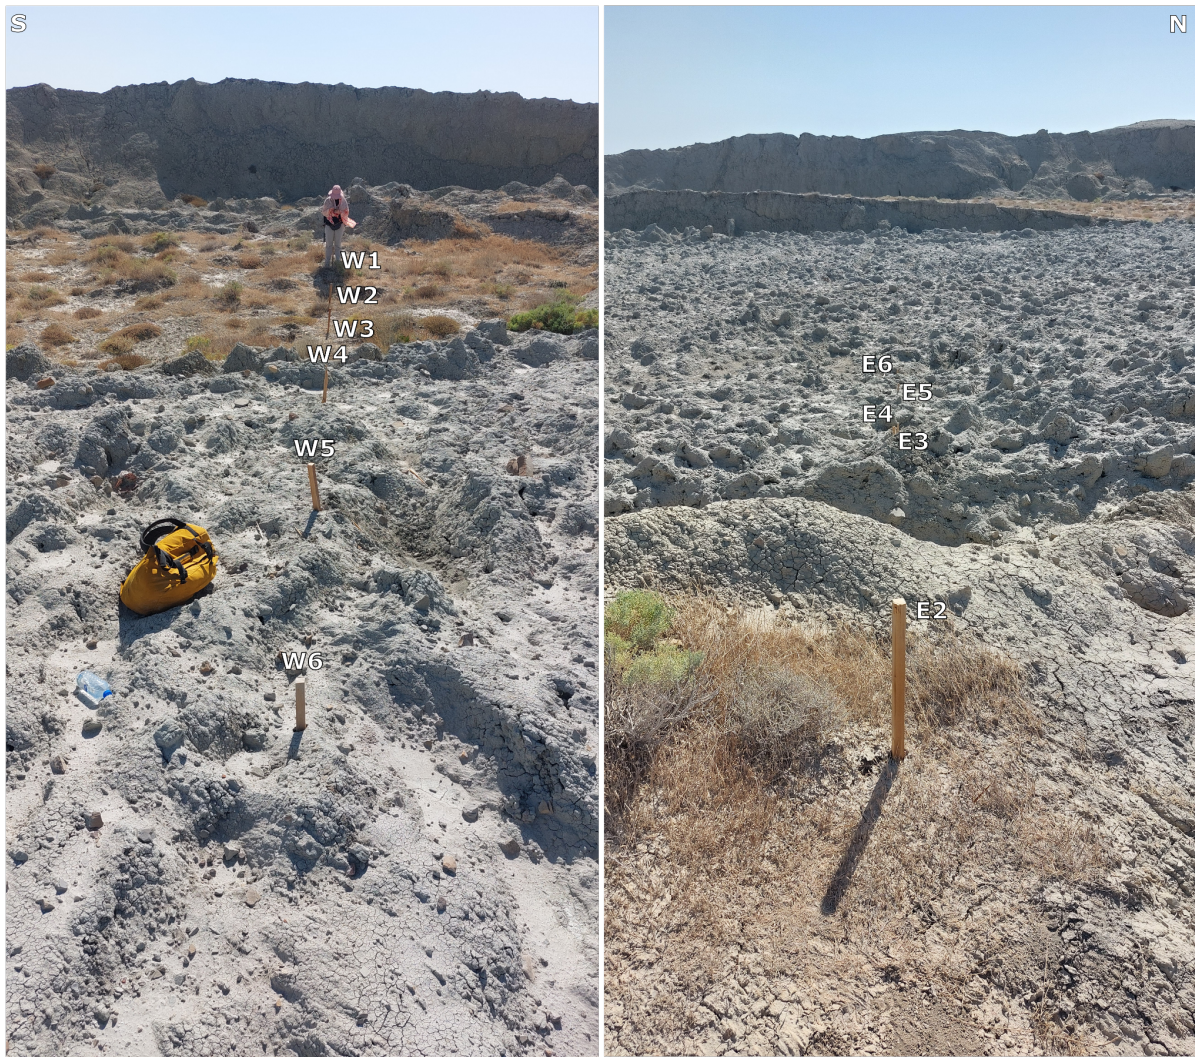



S22: Photos of sticks AZ-25-STI-1 to 6 on Durandag

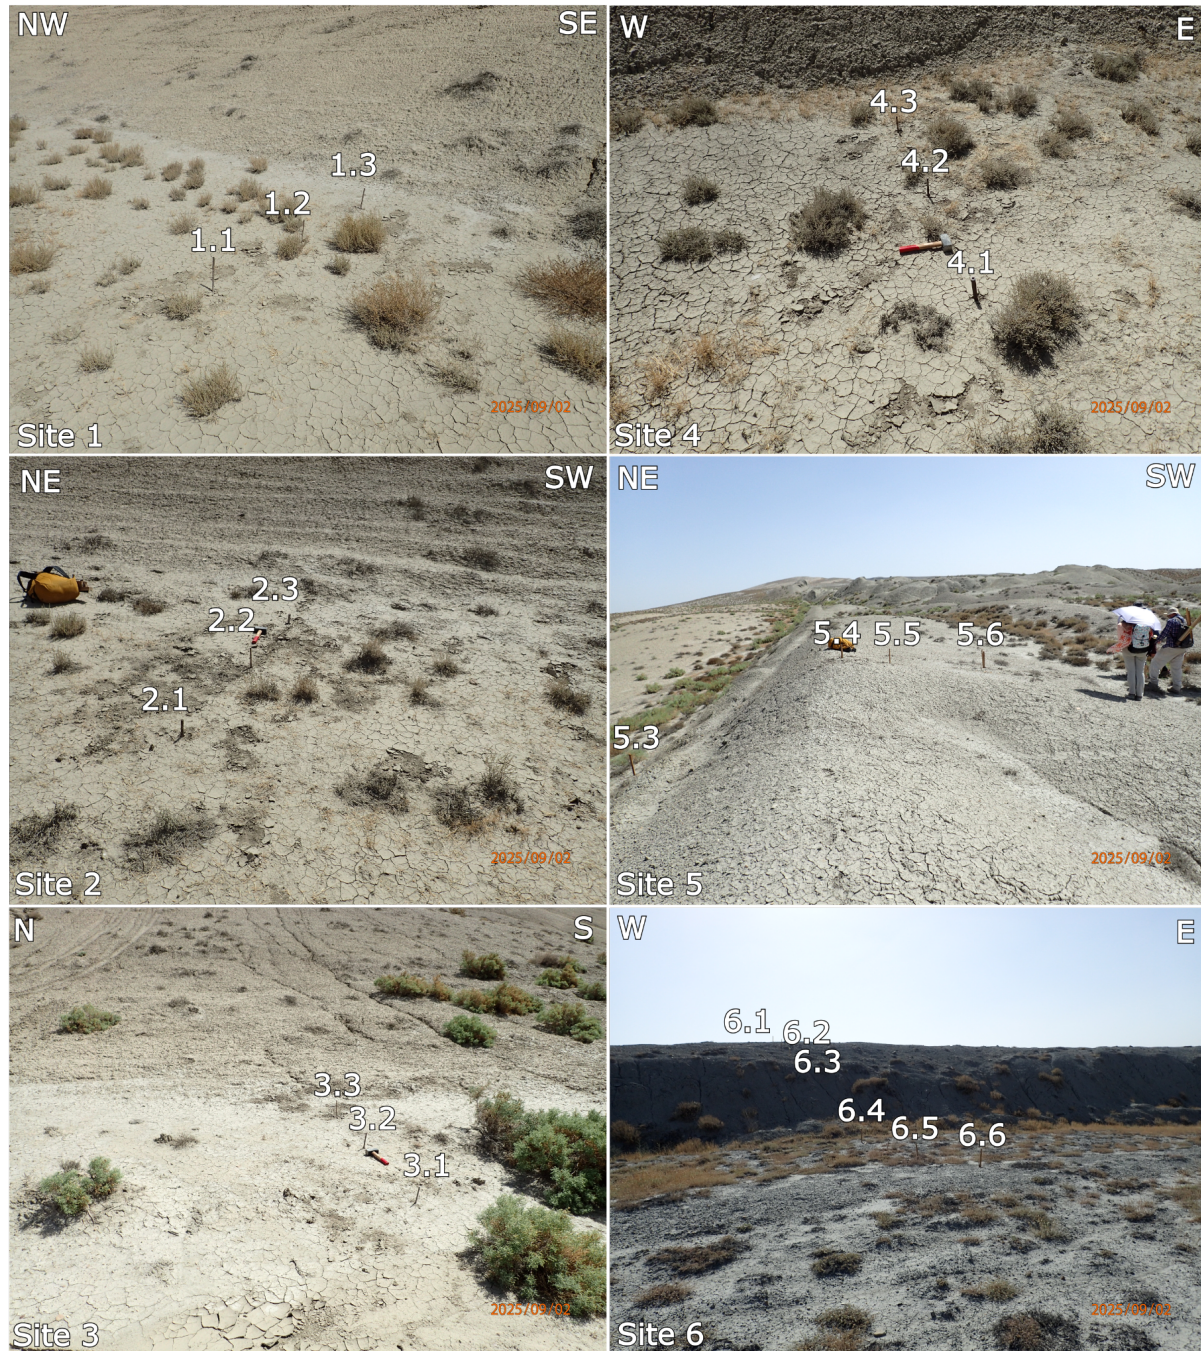

S23: Zip file containing all .kmz points of our study for MVs and their displacements for the Google Earth software.
