# Supplementary material for: Mud Volcano Dynamics in Azerbaijan: The Overlooked Role of Creeping Mud Flows in Landscape Evolution
Source: Copernicus journal article supplement (doi:10.5194/egusphere-2025-6289), 2026-01-09
Supplement: Supplementary file [file egusphere-2025-6289-RC1-supplement.pdf]

4,59  
7-150  
Ад.А.Алиев, И.С.Гулиев, Р.Р.Рахманов

# **КАТАЛОГ ИЗВЕРЖЕНИЙ ГРЯЗЕВЫХ ВУЛКАНОВ АЗЕРБАЙДЖАНА**

(2008 – 2019 гг.)

Ad.A. Aliyev, I.S.Guliyev, R.R.Rahmanov

# **CATALOGUE OF MUD VOLCANOES ERUPTIONS OF AZERBAIJAN**

(2008 – 2019)



*Printed by the decision  
of Academic Council of Institute of Geology and Geophysics  
of Azerbaijan National Academy of Sciences*

**Editor:** *Academician Ak.A.Alizadeh*

**Reviewers:** *Academician of ANAS A.A.Feyzullayev  
Corresponding Member of ANAS D.A.Huseynov*

**Ad.Aliyev, I.S.Guliyev, R.R. Rahmanov.**

Catalogue of mud volcanoes eruptions of Azerbaijan (2008-2019).

Baku: Elm, 2019, – 128 p.

*The book provides information about the mud volcanism and the products of volcanoes in Azerbaijan. 45 recorded eruptions on 28 mud volcanoes that occurred over for the past eleven years in Azerbaijan and the adjacent waters of the Caspian Sea were characterized. Some characteristic features of the mud volcanic eruption are considered. The eruptive stage of the activity of mud volcanoes is quantitatively estimated.*

© Ad.A.Aliyev, I.S.Guliyev, R.R.Rahmanov, 2019



### 3. MUD VOLCANO ACTIVITY IN NUMBERS

About 2-5, sometimes even more mud volcano eruptions occurred in Azerbaijan almost every year. So, only in year 2001 there occurred 16 eruptions of mud volcanoes, two of them offshore (Buzovna Pilpilesi, Chigil-deniz). Frequently erupting volcanoes are Lockbatan, Shikhzarli, Keireki, Khare-Zire Island, Gushchu and etc. Each eruption of a mud volcano brings new information for geoscientists - mud volcanologists, the "news" about the processes taking place in the Earth's crust.

Analysis of mud volcano eruptions which have been occurring onshore and offshore over last two centuries allows comprehend some typical features of mud volcano occurrence, in general, and in some regions of mud volcanoes development within Azerbaijan area in particular. So, 432 eruptions of 93 mud volcano have been recorded during this time frame that makes 26 % of 353 volcanoes known in Azerbaijan. There are records about other mud volcano eruptions occurred in 1924, but having no definite location and name (Table 5).

Table 5

Mud volcano eruptions recorded within petroleum regions in Azerbaijan  
(during 1810-2019)

| Volcano                               | Years of eruptions                                                                                              | Volcano             | Years of eruptions                               |
|---------------------------------------|-----------------------------------------------------------------------------------------------------------------|---------------------|--------------------------------------------------|
| pre-Caspian-Guba region               |                                                                                                                 | Lower Kur region    |                                                  |
| Zarat-deniz                           | 1953                                                                                                            | Kalamaddin          | 1872                                             |
|                                       |                                                                                                                 | Akhtarmaardy        | 1990, 2916                                       |
| Absheron region (eponymous peninsula) |                                                                                                                 | Akhtarma-Pashaly    | 1948, 1962, 1969, 1982 (twice), 1986, 2013, 2018 |
| Kechaldag                             | 2000                                                                                                            | Kichik Haramy       | 1912                                             |
| Uchtepe                               | 1967, 1986, 1992, 1998, 2002, 2004, 2005                                                                        | Hamamdag            | 1938, 1947, 1967, 1984, 1996                     |
| Beyukdag                              | 1921, 1922                                                                                                      | Agzibir             | 1964, 1978, 2002                                 |
| Zykh Pilpilesi                        | 1993 (twice)                                                                                                    | Bendovan            | 1932, 1989                                       |
| Keireki                               | 1824, 1830, 1865, 1882,1885, 1902, 1915, 1952, 1953, 1957, 1964, 1966, 1968, 1989, 1991, 2001, 2002, 2004, 2017 | Kursangi            | 1965                                             |
|                                       |                                                                                                                 | Durovdag            | 1953                                             |
|                                       |                                                                                                                 | Duzdag              | 1941                                             |
| Bozdag-Hokmaly                        | 1926, 1965, 2001                                                                                                | Oil salse           | 1882                                             |
| Bozdag-Gobu                           | 1827, 1894, 1937, 1953, 1957, 1974, 1986, 1987, 1999                                                            | Neftchala Pilpilesi | 1947 (twice)                                     |

|                                                |                                                                                                                                                            |                         |                                                                              |            |
|------------------------------------------------|------------------------------------------------------------------------------------------------------------------------------------------------------------|-------------------------|------------------------------------------------------------------------------|------------|
| Bozdag-Guzdek                                  | 1839, 1867, 1902, 1969, 1986, 1988, 1995, 2003, 2009, 2018                                                                                                 | <b>Baku archepalogo</b> |                                                                              |            |
| Saryncha                                       | 1936, 1976                                                                                                                                                 | Zenbil Island           | 1961, 1995, 2019                                                             |            |
| Gyzyltepe                                      | 1914 (twice)                                                                                                                                               | Khare-Zire Island       | 1810, 1857, 1859, 1886, 1940, 1947, 1959, 1960, 1962, 1974, 1993, 1997, 2006 |            |
| Akhtarma-Puta                                  | 1923, 1933, 1950                                                                                                                                           |                         |                                                                              |            |
| Lockbatan                                      | 1829, 1864, 1884, 1887, 1890, 1900, 1904, 1915, 1918, 1923, 1926, 1933, 1935, 1938, 1941, 1954, 1959, 1964, 1972, 1977, 1980, 1990, 2001, 2919, 2912, 2017 |                         |                                                                              | Gil Island |
| Otmanbozdag                                    | 1854, 1904, 1922, 1951, 1965, 1985, 1994, 2004, 2017, 2018                                                                                                 | Garasu Island           | 1876 (twice), 1923, 1977, 1993                                               |            |
| <b>Absheron region (eponymous archipelago)</b> |                                                                                                                                                            | Balygly shoal           | 1868, 1913                                                                   |            |
| Absheron shoal                                 | 1888                                                                                                                                                       | Chigil Island           | 1967                                                                         |            |
| Buzovna - Pilpilesi                            | 1892, 1915, 1923, 1950, 1953 (twice), 2001                                                                                                                 | Sabail shoal            | 1907, 1915, 1970                                                             |            |
|                                                |                                                                                                                                                            | Sengy-Mugan Island      | 1903, 1923, 1932, 1933, 2002                                                 |            |
| Palchig Pilpile-si                             | 1935, 1950                                                                                                                                                 | Dashly Island           | 1920, 1945                                                                   |            |
|                                                |                                                                                                                                                            | Mugan-daniz shoal       | 1942, 1957                                                                   |            |
| Neft Dashlary                                  | 1904, 1949, 1951, 1957                                                                                                                                     | Chigil-daniz shoal      | 1861,1927 (twice), 1928, 1939, 1950, 1959, 2001                              |            |
| Shoal “1906”                                   | 1906                                                                                                                                                       |                         |                                                                              |            |
| Shoal “1908”                                   | 1908                                                                                                                                                       |                         |                                                                              |            |
| Shoal “1933”                                   | 1933                                                                                                                                                       | Yanan-Tava shoal        | 1813, 1825, 1843, 1868                                                       |            |
| Shoal “1960”                                   | 1960                                                                                                                                                       |                         |                                                                              |            |
| Bahar-daniz shoal                              | 1876, 1912, 1917, 1921, 1925, 1941, 1958, 1963, 1984                                                                                                       |                         |                                                                              |            |
| Kapaz                                          | 1980                                                                                                                                                       |                         |                                                                              |            |

| Shamakhy-Qobustan region |                                                                                                                                                      |                          |                                                                         |                          |
|--------------------------|------------------------------------------------------------------------------------------------------------------------------------------------------|--------------------------|-------------------------------------------------------------------------|--------------------------|
| Demirchi                 | 1958, 1969, 1971, 2008                                                                                                                               | Agnohur                  | 1927, 1940, 1948, 1976, 1986, 2010                                      |                          |
| Zeyva (Basgal)           | 1926                                                                                                                                                 | Cheildag (north.)        | 1970                                                                    |                          |
| Kurdamich                | 1971                                                                                                                                                 | Cheildag (west.)         | 1970, 2018                                                              |                          |
| Gyzmeidan                | 1987, 2001                                                                                                                                           | Cheildag (east.)         | 1870, 1957, 1968, 2004                                                  |                          |
| Gasymkend                | 1993                                                                                                                                                 | Davalidag (south-east.)  | 1975                                                                    |                          |
| Jeirly                   | 1951, 1983, 2001                                                                                                                                     | Dashmardan               | 1866, 1954, 1976, 1986, 2011                                            |                          |
| Hajyly                   | 1970                                                                                                                                                 | Shekikhan (vest.)        | 1988, 1989 (twice), 2001, 2004, 2006, 2010, 2017, 2018                  |                          |
| Melikchobanly            | 1926, 1967, 1977, 2019                                                                                                                               | Shekikhan (east.)        | 1989, 2006, 2018                                                        |                          |
| Gushchu                  | 1913, 1917, 1924, 1941,1952, 1954, 1958, 1960,1965, 1968, 1986, 1992, 2008, 2018, 2019                                                               | Gotur                    | 1989, 2001, 2004, 2005                                                  |                          |
| Kolany                   | 1845, 1962, 1969                                                                                                                                     | Toragay                  | 1841, 1901,1924, 1932, 1947, 1950, 1984, 1985, 1987, 1988, 2018 (twice) |                          |
| Kichik Maraza            | 1848, 1970, 1986                                                                                                                                     | Beyuk Kyan-izadag        | 1950, 1996                                                              |                          |
| Bozaakhtarma             | 1902, 1969, 1970, 1987, 2017                                                                                                                         | Durandag                 | 1960, 1968, 1986, 2001, 2004, 2016                                      |                          |
| Shihzarli                | 1844, 1848, 1868, 1872, 1902, 1927, 1929, 1939, 1944, 1946, 1949, 1955, 1969, 1974, 1980, 1986, 1987, 1991, 1992, 1997, 2004, 2011, 2013, 2017, 2018 | Agtirme                  | 1913, 1971 (twice), 1985, 1988, 1989, 1998, 2000                        |                          |
| Jengi                    | 1851, 1873                                                                                                                                           |                          | Solakhay                                                                | 1949, 1989 (twice), 2001 |
|                          |                                                                                                                                                      |                          | Garakyura                                                               | 1928, 1951               |
| Garyja                   | 1970, 1987, 2003, 2007, 2011, 2017, 2019                                                                                                             | Garabujag (Hajiveliyeri) | 1954, 1963, 2001                                                        |                          |
| Shorsulu                 | 1986                                                                                                                                                 | Oyoug                    | 1988 (twice), 2019                                                      |                          |

|                           |                                                                          |                              |                                                |
|---------------------------|--------------------------------------------------------------------------|------------------------------|------------------------------------------------|
| Sheytanud                 | 1975                                                                     | Ayranteken                   | 1964, 1969, 1977, 1988, 1990, 2004, 2008       |
| Chapilmysh                | 1929, 1933, 1973, 1984, 1989, 2001, 2010                                 |                              |                                                |
| Ayazakhtarma              | 1926, 1969, 1973 (twice), 1985, 1989, 2001, 2005, 2006, 2007, 2011, 2018 | Goturdag                     | 1926, 1959, 1966, 1970, 1977, 1987             |
| Nardaran-akhtarma (west)  | 1948, 1970, 1972, 1982, 1984, 1986, 1996, 2001, 2015                     | Dilyangyaz                   | 1902, 1912, 1951                               |
|                           |                                                                          | Dashgil                      | 1882, 1886, 1908, 1926, 1958, 2001             |
| Suleiman-akhtarma (east.) | 2004, 2014, 2017                                                         | Bahar                        | 1853, 1859, 1885, 1886, 1911, 1926, 1967, 1992 |
|                           |                                                                          | Alyat Pilpilesi (Bala Bahar) | 1909, 1953, 1962                               |

During this time 23 mud volcanoes were erupted only once, 39 mud volcanoes – 5 times, 24 mud volcanoes – from 5 to 10 times and only 7 mud volcanoes erupted more than 10 times. Most active mud volcanoes are Lockbatan and Kaireki within Absheron peninsula; Shikhzarli, Gushchu, Ayazakhtarma and Toragay within Shamakhy-Gobustan region and Khare-Zire within Baku archipelago (Fig. 10).

Long-term studies of mud volcanoes in Azerbaijan allows to identify as a whole that those volcanoes have been erupting frequently where mud griffons does not occur within the crater fields (Lockbatan, Keireki) or the latter ones occur very rarely (Shikhzarli, Gushchu).

Here is the dynamics trend of the most active mud volcano eruptions in Azerbaijan, the world “record-holder” by a number of eruptions – mud volcano Lockbatan located in the south-west area of Absheron peninsula can be mentioned as an example. First eruption was recorded in 1829. The following ones were in 1864, 1887, 1890, 1900, 1904, 1615, 1918, 1923, 1926, 1933, 1935, 1938, 1941, 1954, 1959, 1964, 1972, 1977, 1980, 1990, 2001, 2010, 2012 and 2017.

Almost all Lockbatan mud volcano eruptions was associated with huge amount of outburst breccias, inflamed gas emerging like blazing column of fire rocketed up to 300-400m high, flowing mud breccias with lobes extended down the cone slope over 200-250 m long. Duration of mud volcano eruption varies widely. Some eruptions continued for 10-15 minutes, others continued much longer, in some cases up to 3-4 hours continually. For example, during 1977 eruption there were observed 6 stages of mud volcano activity. Some strong mud volcano eruptions occurred in 1887, 1933, 1954, 1959, 1972, 1977, 2001 and 2012. Fig. 15 displays volumetric breccias masses outburst by Lockbatan mud volcano and areas covered with mud breccias at various times.
